# Supplementary material for: Fabrication of high-density silver nanoparticles on the surface of alginate microspheres for application in catalytic reaction
Source: Royal Society of Chemistry journal article supplement (doi:10.1039/c4ta00632a), 2014-01-01
Supplement: c4ta00632a1.pdf [file c4ta00632a1.pdf]

## Electronic Supplementary Information

### **Fabrication of high-density silver nanoparticles on the surface of alginate microspheres for application in catalytic reaction**

Jun You, Chengcheng Zhao, Jinfeng Cao, Jinping Zhou\*, and Lina Zhang

*Department of Chemistry and Key Laboratory of Biomedical Polymers of Ministry of  
Education, Wuhan University, 430072, China*

---

\* Corresponding author, Tel: +86-27-68752977, Fax: +86-27-68754067

E-mail: [zhoujp325@whu.edu.cn](mailto:zhoujp325@whu.edu.cn) (J. Zhou)

**Table S1.** Conditions and results for the preparation of QC-Ag NPs.

| Sample | $c_{\text{QC}}$ (mg/mL) | $\zeta$ -potential (mV) | SPR position (nm) | Ag content (%) |
|--------|-------------------------|-------------------------|-------------------|----------------|
| QC-Ag1 | 1                       | 20.7                    | 402               | 11.6           |
| QC-Ag2 | 0.5                     | 16.8                    | 402               | 20.8           |
| QC-Ag3 | 0.25                    | 17.3                    | 398               | 34.4           |
| QC-Ag4 | 0.1                     | 16.4                    | 400               | 56.7           |
| QC-Ag5 | 0.05                    | 15.9                    | 400               | 72.4           |

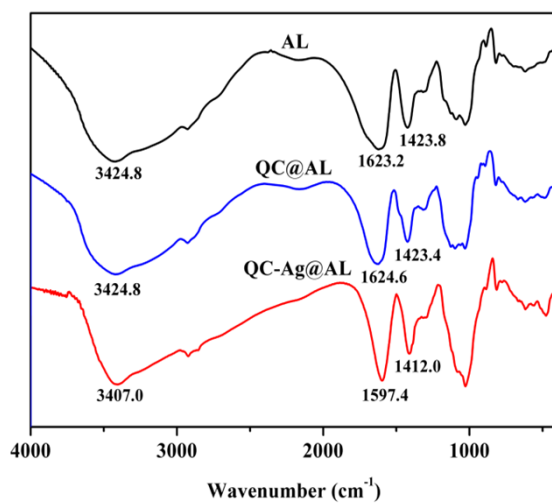

**Fig. S1** FT-IR spectra of the AL, QC/AL and QC-Ag@AL microspheres.

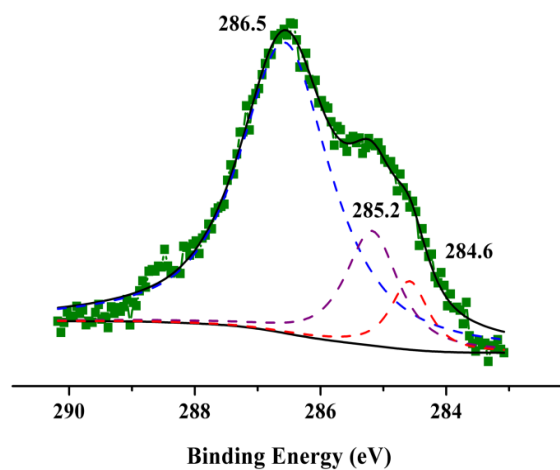

**Fig. S2** XPS analysis of QC.

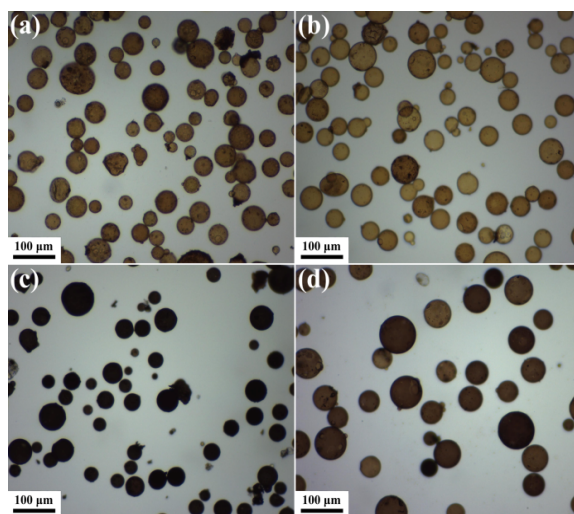

**Fig. S3** Effects of pH value on the morphology of QC-Ag3@AL (above) and QC-Ag5@AL (below) microspheres (left: 0.1 M HCl, right: 0.1 M NaOH).

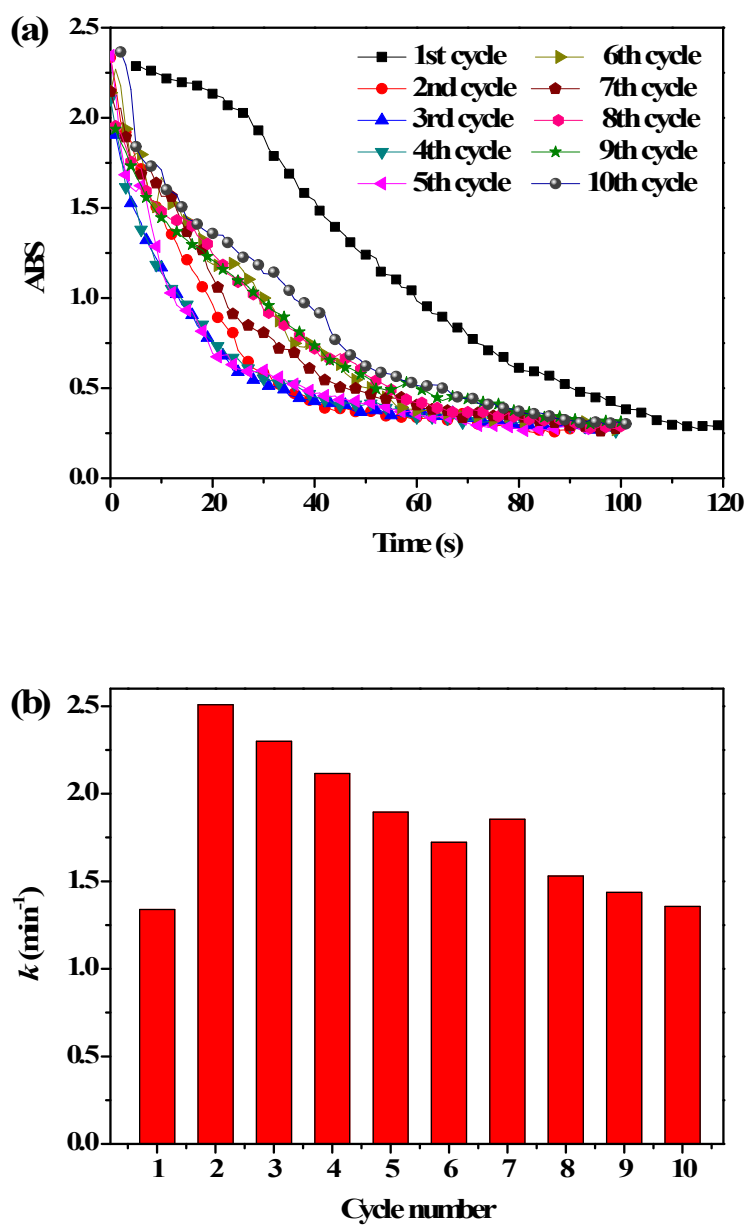

**Fig. S4** (a) Plot of ABS against the reaction time for ten successive cycle reactions using QC-Ag4@AL microspheres as catalyst; (b) The reaction rate constant ( $k$ ) for each cycle with QC-Ag4@AL microspheres as catalyst.
